# Supplementary material for: Grain-size distribution unmixing using the R package EMMAgeo
Source: Copernicus journal article supplement (doi:10.5194/egqsj-68-29-2019), 2019-05-16
Supplement: Supplementary file 1 [file egqsj-68-29-2019-supplement.zip]

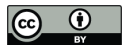

## *Supplement of*

# **Grain-size distribution unmixing using the R package EMMAgeo**

**Elisabeth Dietze and Michael Dietze**

*Correspondence to:* Elisabeth Dietze (edietze@awi.de)

- egqsj-68-29-2019-supplement-title-page.pdf
- Analysis\_and\_figures.R
- EM.txt
- Example-data-EMMAgeo.kmz
- Supplementary Code EMMAgeo-paper Dietze.doc
- X.txt
- benchmark.rda
- ratios.txt
- units.txt

The copyright of individual parts of the supplement might differ from the CC BY 4.0 License.
